# Supplementary material for: Graphene supported mesoporous single crystal silicon on Cu foam as a stable lithium-ion battery anode
Source: Royal Society of Chemistry journal article supplement (doi:10.1039/c4ta03370a), 2014-08-07
Supplement: c4ta03370a1.pdf [file c4ta03370a1.pdf]

## Supporting Information

### Graphene supported mesoporous single crystal silicon on Cu foam as stable lithium-ion battery anode

Shilong Jing, Hao Jiang,\*Yanjie Hu, Chunzhong Li\*

Key Laboratory for Ultrafine Materials of Ministry of Education, School of Materials Science and Engineering, East China University of Science and Technology, Shanghai 200237, China

Email: [jianghao@ecust.edu.cn](mailto:jianghao@ecust.edu.cn) (H. Jiang) and [czli@ecust.edu.cn](mailto:czli@ecust.edu.cn) (C. Li)

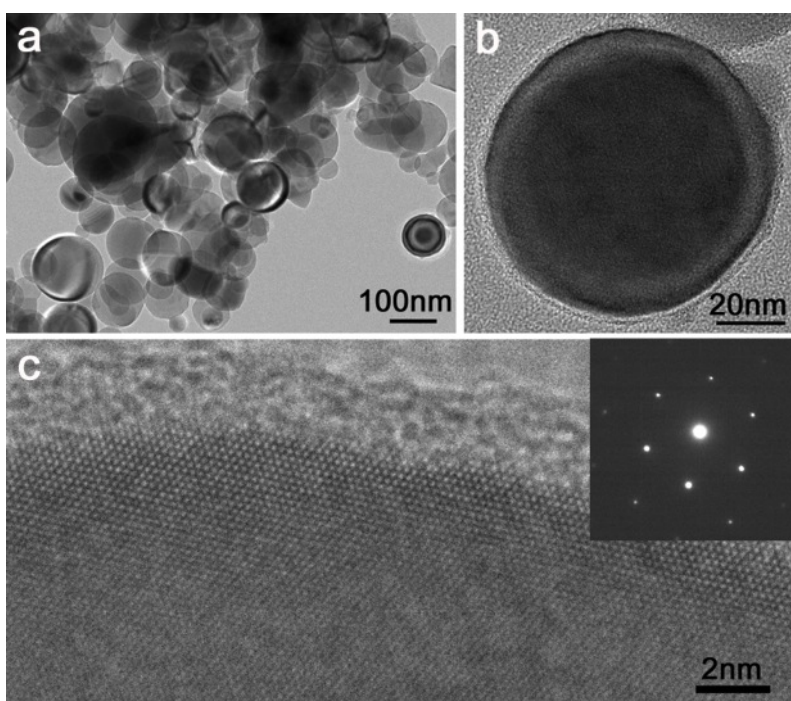

**Fig. S1**(a,b) TEM and (c) HRTEM images of PNPs Si nanoparticles, inset showing the corresponding SAED pattern of (220) plane.

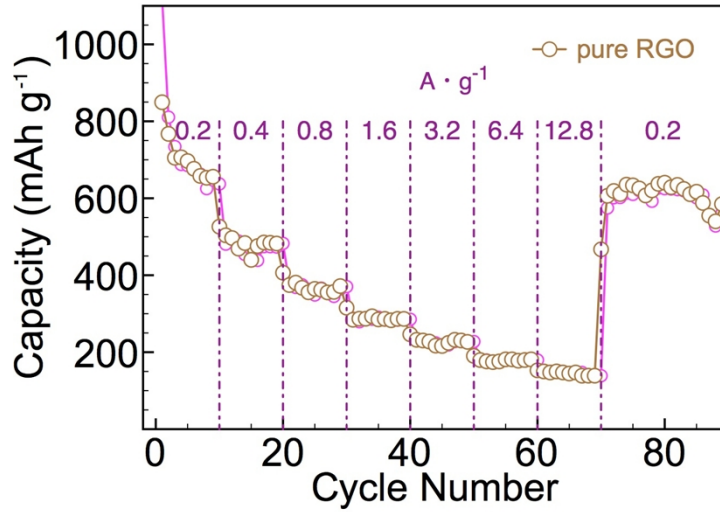

**Fig. S2** Rate performances of pure graphene from 200 to 12800 mA g<sup>-1</sup>.

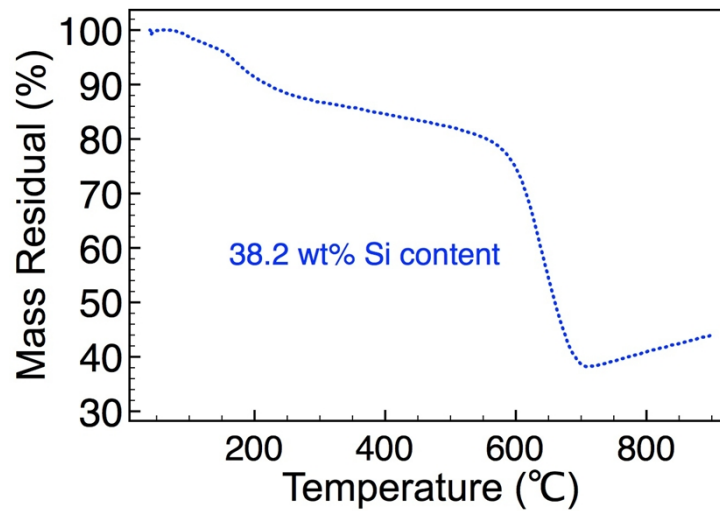

**Fig. S3** Thermogravimetric analysis of MSCs-Si/G hybrids, the result shows the mass fraction of Si is 38.2%.

Figure S3 shows the thermal gravimetric analysis (TGA) profile recorded during heating in air. A nearly 61.8% weight loss was recorded at 700 °C due to combustion of the graphene. And then the mass of the Si component increased because of the oxidation of Si.<sup>1,2</sup>

1. J. Ji, H. Ji, L. L. Zhang, X. Zhao, X. Bai, X. Fan, F. Zhang, and R. S. Ruoff, *Adv. Mater.*, 2013, **25**, 4673–4677.
2. X. Zhao, C. M. Hayner, M. C. Kung, and H. H. Kung, *Adv. Energy Mater.*, 2011, **1**, 1079–1084.
